# Supplementary material
Source: PubMed Central journal article supplement (PMC3913356)
Supplement: supp_mol.113.089763_Supplementary_table_89763.pdf [file supp_mol.113.089763_Supplementary_table_89763.pdf]

# Metformin represses drug-induced expression of CYP2B6 by modulating the constitutive androstane receptor signaling

Hui Yang, Brandy Garzel, Scott Heyward, Timothy Moeller, Paul Shapiro, and Hongbing Wang

Molecular Pharmacology

Supplementary table Information of human liver donors

| Donor code | Gender | Age(years) | BMI* | Race      |
|------------|--------|------------|------|-----------|
| HL#65      | Male   | 29         | 25.1 | Caucasian |
| HL#66      | Male   | 61         | 33.2 | Caucasian |
| HL#69      | Female | 78         | 26.8 | Caucasian |
| HL#73      | Male   | 53         | 38.9 | Caucasian |
| HL#74      | Female | 37         | 31.9 | Caucasian |
| HL#76      | Female | 74         | 23.0 | Caucasian |
| HL#77      | Male   | 50         | 27.6 | Caucasian |
| HL#78      | Male   | 67         | 37.6 | Caucasian |
| HL#80      | Male   | 59         | 26.6 | Caucasian |
| HL#81      | Male   | 58         | 30.8 | Caucasian |
| HL#82      | Female | 51         | 34.2 | Caucasian |
| HL#83      | Male   | 81         | 26.6 | Caucasian |

\* BMI: body mass index.
